# Supplementary material
Source: PubMed Central journal article supplement (PMC3131910)
Supplement: cdd2010144x1.pdf [file cdd2010144x1.pdf]

**A**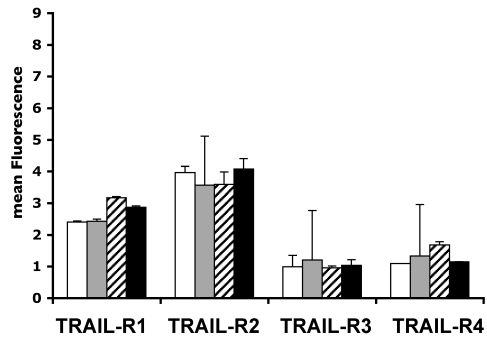**B**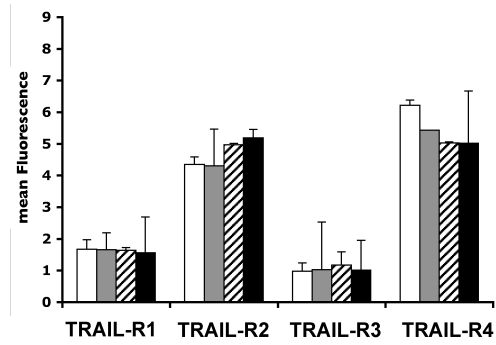

**Supplementary Figure 1: FACS analysis of TRAIL receptor after chemotherapy** Example of one representative analysis of TRAIL receptor expression in (A) control HeLa cells (H-Ctl) (B) H-TRAIL-R4 cells, 48 hours (CDDP and VP16) or 72 hours (5FU) after chemotherapy. Untreated cells (white), stimulated with CDDP (grey), VP16 (dashed) or 5FU (black).
