# Supplementary material
Source: PubMed Central journal article supplement (PMC3131910)
Supplement: cdd2010144x2.pdf [file cdd2010144x2.pdf]

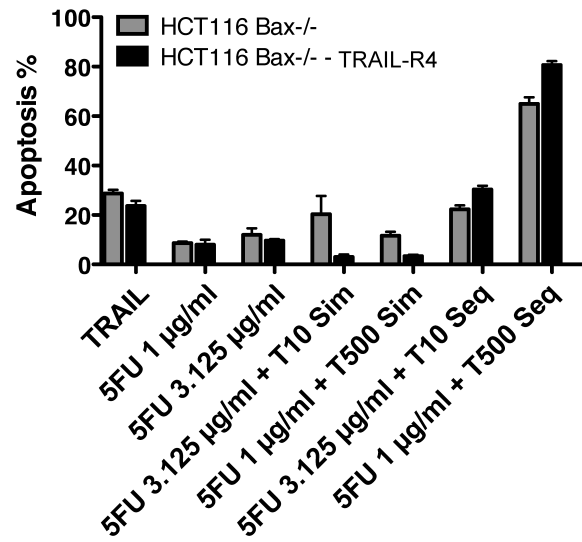

**Supplementary Figure 2: Comparison of treatments schemes, sequential versus simultaneous combined *TRAIL* and *5FU*.** HCT116 cells deficient for Bax expression (grey bars) or Bax-deficient cells ectopically expressing TRAIL-R4 (black bars) were stimulated with 500 ng recombinant His-TRAIL, 1 µg/ml or 3.125 µg/ml 5FU for 72 hours or the combinations for 24 hours at the indicated concentrations, either sequentially (Seq) or simultaneously (Sim). Apoptosis was determined by Hoescht staining 24 h after TRAIL stimulation.
