# Supplementary material
Source: PubMed Central journal article supplement (PMC3131910)
Supplement: cdd2010144x3.pdf [file cdd2010144x3.pdf]

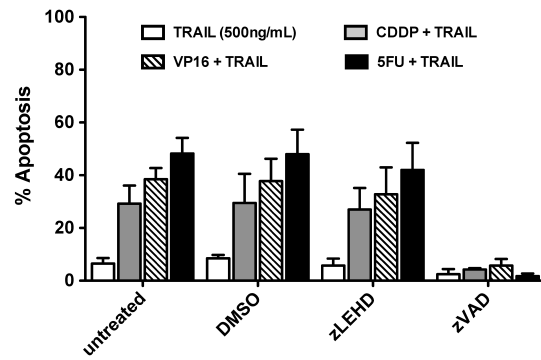

**Supplementary Figure 3: The Pancaspase inhibitor zVAD but not the Caspase-9 inhibitor zLEHD abrogates chemotherapy-induced sensitization to TRAIL.** After chemotherapy, parental H-TRAIL-R4 cells were pretreated for 30 minutes, prior His-TRAIL stimulation (500 ng/ml, 6 hours) with 25  $\mu$ M of z-VAD-fmk, 25  $\mu$ M z-LEHD-fmk or the corresponding amount of DMSO. Apoptosis was measured by Hoechst staining. These results are representative of 3 independent experiments. Mean apoptosis values and SD are shown (mean  $\pm$  SD).
